# Supplementary material for: Role of Psychosocial Factors and Health Literacy in Pregnant Women’s Intention to Use a Decision Aid for Down Syndrome Screening: A Theory-Based Web Survey
Source: PubMed Central journal article supplement (PMC5106559; doi:10.2196/jmir.6362), 2016-10-28
Supplement: jmir_v18i10e283_app1.pdf [file jmir_v18i10e283_app1.pdf]

Select Question(Link) ▼

## SurveyInfo

ONLY DISPLAYED IN TEST MODE

**STATUS:**  
 StatusLeger: incomplet  
 INTCODE: Incomplete

**VERSION:**  
 VERSI: 1

**LINK INFO:**  
 IDCON: p4379613  
 SLINK: [https://ci.legerweb.com/extwix/test\\_p4379613.aspx?\\_\\_etk=VASGCTRPIYU&r=262&s=HAPSOCDP](https://ci.legerweb.com/extwix/test_p4379613.aspx?__etk=VASGCTRPIYU&r=262&s=HAPSOCDP)  
 SID: HAPSOCDP  
 QID: 0000000262

**REDIRECTS:**  
 ECHAN: NO RESPONSE  
 REDIR: <https://Legerweb.com/ES.asp?lmid=&CodeSurvey=&l=&ldCamp=&Flag=C>  
 REDI: <https://Legerweb.com/ES.asp?lmid=&CodeSurvey=&l=&ldCamp=&Flag=S>  
 REDIQ: <https://Legerweb.com/ES.asp?lmid=&CodeSurvey=&l=&ldCamp=&Flag=Q>  
 REDIRTXT: Please click on the following arrow to receive your reward(s).

**RESPONDENT DEVICE INFO:**  
 BrowserName:  
 BrowserType: Chrome  
 BrowserVersion: 45.0  
 IP Address: 132.203.245.9  
 User Agent: Mozilla/5.0 (Windows NT 6.1; WOW64) AppleWebKit/537.36 (KHTML, like Gecko) Chrome/45.0.2454.85 Safari/537.36  
 Device Type: Laptop/PC  
 Survey Rendering Mode: Desktop: Desktop rendering (PC/Mac/tablet)  
 Operating System: Windows 7

**SURVEY LAYOUT:**  
 CurrentSurveyLayout: Main theme - with Title

>>

The image shows three sequential screenshots of a 'Select Question(Link)' dropdown menu. The first screenshot shows a list of questions including 'Question INT01', 'Question FILTRE1', 'Question HOMME1', 'Question HOMME2', 'Question HOMME3', 'Question HOMME4', 'Question FILTRE2', 'Question FILTRE3', 'Question FILTRE4', 'Question FILTRE5', 'Question FILTRE6', 'Question FILTRE7', 'Question Q0QC', 'Question Q31', 'Question Q32', 'Question Q36', 'Question Q38', and 'Question ADMISSIB'. The second screenshot shows a different list including 'Question Q38', 'Question ADMISSIB', 'Question VIDEO', 'Question FILTRE8', 'Question INTRO', 'Question Q1', 'Question Q2', 'Question Q3', 'Question Q4', 'Question Q5A', 'Question Q6A', 'Question Q7AE', 'Question Q8', 'Question Q9A', 'Question Q10', 'Question Q11', 'Question Q12', 'Question Q13', 'Question Q14', and 'Question Q15'. The third screenshot shows a list including 'Question Q13', 'Question Q14', 'Question Q15', 'Question Q16Q19', 'Question Q20', 'Question Q27A', 'Question Q28\_3D1', 'Question Q29A', 'Question Q30A', 'Question SOCIO', 'Question Q33', 'Question Q34', 'Question Q35', 'Question Q37', 'Question Q39', 'Question Q40', 'Question Q41', 'Question Q42\_3D', 'Question Q44\_3D', and 'Question Q45'. Red arrows indicate a selection path from 'Question Q16Q19' in the second screenshot to 'Question Q13' in the third screenshot.

Select Question(Link) ▾

### Survey language

Préférez-vous répondre à ce questionnaire en anglais ou en français ?

Would you prefer to complete the survey in English or French?

English (Anglais)

Français (French)

>>

Select Question(Link) ▾

### INT01 - ASK ALL

This province-wide survey is directed by a research team in public health at Université Laval, Quebec city, Quebec. Your answers are important for helping us improve a sector of your health care. Therefore, do you agree to answer the following survey questions truthfully and thoughtfully?

I agree

I disagree

>>

Select Question(Link) ▾

### FILTRE1

Are you...

A man

A woman

>>

Filters for men:

Select Question(Link) ▾

### HOMME1

Do you have a female partner?

Yes

No

>>

Select Question(Link) ▾

### HOMME2

How old is she?

Less than 18 years old

18 to 44 years old

45 to 70 years old

More than 70 years old

>>

Select Question(Link) ▼

### HOMME3

Is she...

*Please check everything that applies to her.*

- Pregnant
- Diabetic
- Menopausal
- Asthmatic
- None of the above

>>

Select Question(Link) ▼

### HOMME4

Your partner may be eligible to do this survey, which takes approximately 30 minutes to complete. If she is eligible to answer the whole questionnaire, she will get \$25.

If your partner is not available right now, you can close the window, and come back later with her by clicking on the same link.

Thank you for your collaboration.

Please click on the following arrow if your partner wants to continue this survey on her own.

- My partner doesn't want to participate

>>

Select Question(Link) ▼

### FILTRE2

How old are you?

- Less than 18 years old
- 18 to 44 years old
- 45 to 70 years old
- More than 70 years old

>>

Filters for women:

Select Question(Link) ▾

**FILTRE2**

How old are you?

Less than 18 years old

18 to 44 years old

45 to 70 years old

More than 70 years old

>>

Select Question(Link) ▾

**FILTRE3**

Are you...

*Please check everything that applies to you.*

Pregnant

Diabetic

Menopausal

Asthmatic

None of the above

>>

Select Question(Link) ▾

**FILTRE4**

How many weeks have you been pregnant?

Less than 16 weeks

16 to 30 weeks

More than 30 weeks

>>

Select Question(Link) ▾

**FILTRE5**

Have you already made a decision about doing a prenatal screening test for trisomy 21 or not?

I have decided to do a prenatal screening test for trisomy 21.

I have decided NOT to do a prenatal screening test for trisomy 21.

I have made my decision but I would rather not reveal my choice.

I still not have decided if I will do a prenatal screening test for trisomy 21 or not.

>>

Select Question(Link) ▼

### FILTRE6

Is your pregnancy is considered a « high-risk pregnancy »? In other words, do you have gestational diabetes, hypertension, risk of miscarriage or premature delivery, eclampsia or a multiple pregnancy (ex: twins, triplets)?

- I have a high-risk pregnancy
- I don't have a high-risk pregnancy

>>

Select Question(Link) ▼

### FILTRE7

During a previous pregnancy or during your current pregnancy, did you participate in a research project in which we asked you to view this video (see the three (3) representative images below)?

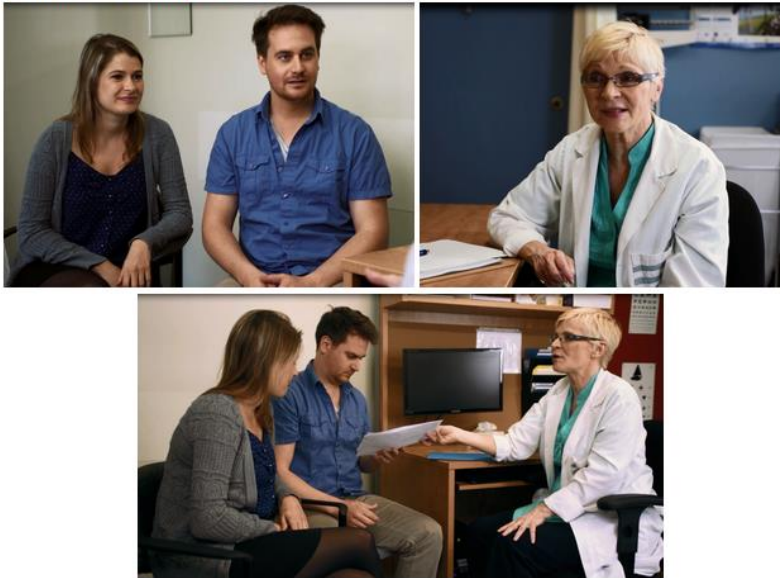

- I already saw this video
- I never saw this video
- I don't know

>>

Select Question(Link) ▼

## Q0QC - ASK ALL

In which region of Quebec do you live?

- Bas-Saint-Laurent
- Saguenay-Lac-Saint-Jean
- Capitale-Nationale
- Mauricie
- Estrie
- Montréal
- Outaouais
- Abitibi-Témiscamingue
- Côte-Nord
- Nord-du-Québec
- Gaspésie/Îles-de-la-Madeleine
- Chaudière-Appalaches
- Laval
- Lanaudière
- Laurentides
- Montérégie
- Centre-du-Québec
- Other, please specify:
- I don't know

>>

Select Question(Link) ▼

## Q31

What is your date of birth?

| Day                         | Month                       | year                        |
|-----------------------------|-----------------------------|-----------------------------|
| Please select your answer ▼ | Please select your answer ▼ | Please select your answer ▼ |

>>

Select Question(Link) ▼

## Q32

What is your ethnic background?

- White/Caucasian
- Black/African/Afro-American, etc.
- Native/Autochthon/First nations
- Latin American (Mexico, Chile, Costa Rica, etc.)
- Arab (Middle East, Maghreb)
- South Asian (India, Bangladesh, Pakistan, Sri-Lanka, etc.)
- Southeast Asian (Vietnam, Cambodia, Malaysia, Laos, etc.)
- West Asian (Iran, Afghanistan, etc.)
- Chinese
- Filipino
- Korean
- Japanese
- Other, please specify:
- I would rather not answer

>>

Select Question(Link) ▼

### Q36

What is the highest level of education for which you OBTAINED a diploma?

- No secondary education
- Secondary education
- Vocational studies (DVS, ACS, etc.)
- Collegial studies
- University studies
- Other, please specify:

>>

Select Question(Link) ▼

### Q38

What is your approximate annual household income?

- Less than \$29,999
- \$30,000 to \$59,999
- \$60,000 to \$99,999
- \$100,000 or more
- I don't know
- I would rather not answer

>>

Select Question(Link) ▼

### ADMISSIB

You are eligible to participate in this study available only for pregnant women.

First, please answer to some questions about numerical information and a few health-related questions.

Next, you will be invited to watch a video of 10 minutes. You must watch the whole video and then complete the questionnaire (about 20 minutes).

To get the \$25, you must complete the whole questionnaire.

At any moment you can interrupt the session and come back later by clicking on the same link.

Please click on the following arrow to start the questionnaire.

>>





How confident are you filling out forms by yourself?

| Never confident       | Rarely confident      | Sometimes confident   | Often confident       | Always confident      |
|-----------------------|-----------------------|-----------------------|-----------------------|-----------------------|
| <input type="radio"/> | <input type="radio"/> | <input type="radio"/> | <input type="radio"/> | <input type="radio"/> |

How often do you have someone help you read hospital materials?

| Always                | Often                 | Sometimes             | Rarely                | Never                 |
|-----------------------|-----------------------|-----------------------|-----------------------|-----------------------|
| <input type="radio"/> | <input type="radio"/> | <input type="radio"/> | <input type="radio"/> | <input type="radio"/> |

How often do you have problems learning about your medical condition because of difficulty reading hospital materials?

| Always                | Often                 | Sometimes             | Rarely                | Never                 |
|-----------------------|-----------------------|-----------------------|-----------------------|-----------------------|
| <input type="radio"/> | <input type="radio"/> | <input type="radio"/> | <input type="radio"/> | <input type="radio"/> |

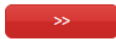

Select Question(Link) ▾

## VIDEO

Here is a video showing the best way to use a **"Decision aid (written document of 4 pages)"** by a couple and their family physician when considering doing or not prenatal screening for Down syndrome (or trisomy 21). In the following survey, we want to find out **your opinion** on the use of this tool **if you ever had** to use it in the future.

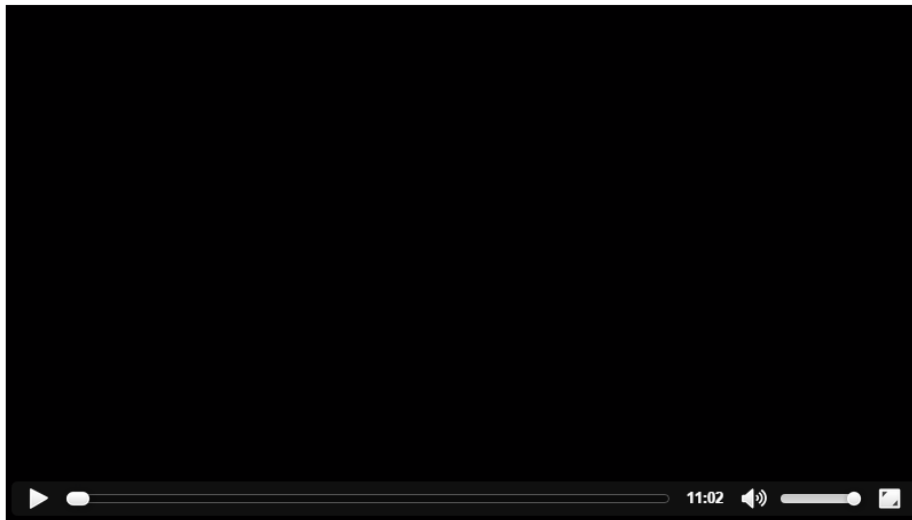

After watching the whole video, an arrow will appear below and you will be able to start the questionnaire.

Select Question(Link) ▾

## FILTRE8 - ASK IF FILTRE7=I don't know

Because you were unsure, can you confirm if you have ever seen this video before or not?

- I have seen this video before  
 I have never seen this video before

>>

Select Question(Link) ▾

## INTRO

Health professionals who monitor pregnancies must inform pregnant women about tests available to screen for Down syndrome (or trisomy 21). Most people want to be involved in decision making about their health. The use of a decision aid can increase the active involvement of pregnant women in making an informed and shared decision that respects their values and preferences.

The video that you just watched showed the best way to use a "**Decision aid (written document of 4 pages)**" by a couple and their family physician when considering prenatal screening for Down syndrome. The goal of the following questionnaire is **to find out your opinion on the use of this decision aid if you ever had to use it in the future.**

In parallel, we are doing a similar project with health professionals who monitor pregnancies to find out their opinion. The objective is to introduce routine use of a decision aid that is adequate and useful for everyone.

### Please note:

1. For each question, please **check the box** which best corresponds to your answer. There are no right or wrong answers. It is **your opinion** that interests us.
2. Certain statements may seem repetitive. This is due to the study's methodology. Please answer **all** questions.
3. It is important that you complete the whole questionnaire **alone**, without any help.
4. By completing this survey, you give your **consent** to participate in this research project.
5. At the end of the questionnaire, we will ask you to answer a few health-related questions and a few sociodemographic questions.

**Your participation is much appreciated, thank you.**

Team of the Canada Research Chair in Implementation of Shared Decision Making in Primary Care. Dr. France Légaré, MD, PhD, clinician researcher and titular professor, CHUQ Research Centre, Department of Family Medicine and Emergency Medicine, Faculty of Medicine, Université Laval, Quebec City, Quebec, Canada.

This project is funded by a research grant from Genome Canada and Genome Quebec and was approved by the ethical review boards of CHU de Québec, CSSS Vieille-Capitale and CSSS Alphonse-Desjardins.

**Please click on the following arrow to start the questionnaire.**

>>

Select Question(Link) ▼

### Q1

In the context of prenatal screening for trisomy 21, using a decision aid...

|                                                                              | Very unlikely         | Somewhat unlikely     | Neither unlikely or likely | Somewhat likely       | Very likely           |
|------------------------------------------------------------------------------|-----------------------|-----------------------|----------------------------|-----------------------|-----------------------|
| ...would help me learn the advantages of doing or not the screening test.    | <input type="radio"/> | <input type="radio"/> | <input type="radio"/>      | <input type="radio"/> | <input type="radio"/> |
| ...would help me make an informed decision.                                  | <input type="radio"/> | <input type="radio"/> | <input type="radio"/>      | <input type="radio"/> | <input type="radio"/> |
| ...would provide me with too much information.                               | <input type="radio"/> | <input type="radio"/> | <input type="radio"/>      | <input type="radio"/> | <input type="radio"/> |
| ...would provide me with useful information.                                 | <input type="radio"/> | <input type="radio"/> | <input type="radio"/>      | <input type="radio"/> | <input type="radio"/> |
| ...would help me learn the disadvantages of doing or not the screening test. | <input type="radio"/> | <input type="radio"/> | <input type="radio"/>      | <input type="radio"/> | <input type="radio"/> |
| ...would facilitate reflection with my spouse.                               | <input type="radio"/> | <input type="radio"/> | <input type="radio"/>      | <input type="radio"/> | <input type="radio"/> |

>>

Select Question(Link) ▼

### Q2

In the context of prenatal screening for trisomy 21, it would be easier for me to use a decision aid...

|                                                                                                                            | Strongly disagree     | Somewhat disagree     | Neither disagree or agree | Somewhat agree        | Strongly agree        |
|----------------------------------------------------------------------------------------------------------------------------|-----------------------|-----------------------|---------------------------|-----------------------|-----------------------|
| ...if it was given to me by my healthcare professional monitoring my pregnancy (example: physician, midwife, nurse, etc.). | <input type="radio"/> | <input type="radio"/> | <input type="radio"/>     | <input type="radio"/> | <input type="radio"/> |
| ...if it was available online.                                                                                             | <input type="radio"/> | <input type="radio"/> | <input type="radio"/>     | <input type="radio"/> | <input type="radio"/> |
| ...if it was available in print.                                                                                           | <input type="radio"/> | <input type="radio"/> | <input type="radio"/>     | <input type="radio"/> | <input type="radio"/> |

>>

Select Question(Link) ▼

### Q3

In the context of prenatal screening for trisomy 21, the following people would approve/disapprove of my using a decision aid:

|                                                                                                | Would strongly disapprove | Would somewhat disapprove | Would neither disapprove or approve | Would somewhat approve | Would strongly approve |
|------------------------------------------------------------------------------------------------|---------------------------|---------------------------|-------------------------------------|------------------------|------------------------|
| my spouse                                                                                      | <input type="radio"/>     | <input type="radio"/>     | <input type="radio"/>               | <input type="radio"/>  | <input type="radio"/>  |
| the healthcare professional monitoring my pregnancy (example: physician, midwife, nurse, etc.) | <input type="radio"/>     | <input type="radio"/>     | <input type="radio"/>               | <input type="radio"/>  | <input type="radio"/>  |
| my parents                                                                                     | <input type="radio"/>     | <input type="radio"/>     | <input type="radio"/>               | <input type="radio"/>  | <input type="radio"/>  |
| my family (other than my parents and my spouse)                                                | <input type="radio"/>     | <input type="radio"/>     | <input type="radio"/>               | <input type="radio"/>  | <input type="radio"/>  |
| my friends                                                                                     | <input type="radio"/>     | <input type="radio"/>     | <input type="radio"/>               | <input type="radio"/>  | <input type="radio"/>  |

>>

Select Question(Link) ▾

In the context of prenatal screening for trisomy 21...

in your view, what percentage of pregnant women around you would use a decision aid.

| None<br>0%            | A quarter<br>25%      | Half<br>50%           | Three quarters<br>75% | All<br>100%           |
|-----------------------|-----------------------|-----------------------|-----------------------|-----------------------|
| <input type="radio"/> | <input type="radio"/> | <input type="radio"/> | <input type="radio"/> | <input type="radio"/> |

>>

Femmes #1 à 44 :

Select Question(Link) ▾

Q5A

In the context of prenatal screening for trisomy 21...

|                                                  | Very unlikely         | Somewhat unlikely     | Neither unlikely or likely | Somewhat likely       | Very likely           |
|--------------------------------------------------|-----------------------|-----------------------|----------------------------|-----------------------|-----------------------|
| ...I would regret NOT having used a decision aid | <input type="radio"/> | <input type="radio"/> | <input type="radio"/>      | <input type="radio"/> | <input type="radio"/> |

|                                                                                                                          | Strongly disagree     | Somewhat disagree     | Neither disagree or or agree | Somewhat agree        | Strongly agree        |
|--------------------------------------------------------------------------------------------------------------------------|-----------------------|-----------------------|------------------------------|-----------------------|-----------------------|
| ...the need to be informed would motivate me to use a decision aid.                                                      | <input type="radio"/> | <input type="radio"/> | <input type="radio"/>        | <input type="radio"/> | <input type="radio"/> |
| ...I would be more motivated to use a decision aid if my healthcare professional showed interest in presenting it to me. | <input type="radio"/> | <input type="radio"/> | <input type="radio"/>        | <input type="radio"/> | <input type="radio"/> |
| ...the need to make an informed decision would lead me to use a decision aid.                                            | <input type="radio"/> | <input type="radio"/> | <input type="radio"/>        | <input type="radio"/> | <input type="radio"/> |
| ...I believe that most of the pregnant women around me would use a decision aid.                                         | <input type="radio"/> | <input type="radio"/> | <input type="radio"/>        | <input type="radio"/> | <input type="radio"/> |

|                                              | Very unlikely         | Somewhat unlikely     | Neither unlikely or likely | Somewhat likely       | Very likely           |
|----------------------------------------------|-----------------------|-----------------------|----------------------------|-----------------------|-----------------------|
| ...I would be fine NOT using a decision aid. | <input type="radio"/> | <input type="radio"/> | <input type="radio"/>      | <input type="radio"/> | <input type="radio"/> |

>>

## Femmes #45 et plus

Select Question(Link) ▾

### Q5A

In the context of prenatal screening for trisomy 21...

|                                                  | Very unlikely         | Somewhat unlikely     | Neither unlikely or likely | Somewhat likely       | Very likely           |
|--------------------------------------------------|-----------------------|-----------------------|----------------------------|-----------------------|-----------------------|
| ...I would regret NOT having used a decision aid | <input type="radio"/> | <input type="radio"/> | <input type="radio"/>      | <input type="radio"/> | <input type="radio"/> |

|                                                                                                                          | Strongly disagree     | Somewhat disagree     | Neither disagree or or agree | Somewhat agree        | Strongly agree        |
|--------------------------------------------------------------------------------------------------------------------------|-----------------------|-----------------------|------------------------------|-----------------------|-----------------------|
| ...the need to be informed would motivate me to use a decision aid.                                                      | <input type="radio"/> | <input type="radio"/> | <input type="radio"/>        | <input type="radio"/> | <input type="radio"/> |
| ...I would be more motivated to use a decision aid if my healthcare professional showed interest in presenting it to me. | <input type="radio"/> | <input type="radio"/> | <input type="radio"/>        | <input type="radio"/> | <input type="radio"/> |
| ...the need to make an informed decision would lead me to use a decision aid.                                            | <input type="radio"/> | <input type="radio"/> | <input type="radio"/>        | <input type="radio"/> | <input type="radio"/> |
| ...I believe that most of the pregnant women around me would use a decision aid.                                         | <input type="radio"/> | <input type="radio"/> | <input type="radio"/>        | <input type="radio"/> | <input type="radio"/> |

|                                                       | Very unlikely         | Somewhat unlikely     | Neither unlikely or likely | Somewhat likely       | Very likely           |
|-------------------------------------------------------|-----------------------|-----------------------|----------------------------|-----------------------|-----------------------|
| ...I would be fine NOT using a decision aid.          | <input type="radio"/> | <input type="radio"/> | <input type="radio"/>      | <input type="radio"/> | <input type="radio"/> |
| ...if I wanted to, I could easily use a decision aid. | <input type="radio"/> | <input type="radio"/> | <input type="radio"/>      | <input type="radio"/> | <input type="radio"/> |

>>

## Q6A

In the context of prenatal screening for trisomy 21...

|                                   | Very difficult        | Somewhat difficult    | Neither difficult or easy | Somewhat easy         | Very easy             |
|-----------------------------------|-----------------------|-----------------------|---------------------------|-----------------------|-----------------------|
| ...using a decision aid would be: | <input type="radio"/> | <input type="radio"/> | <input type="radio"/>     | <input type="radio"/> | <input type="radio"/> |

|                                   | Very detrimental      | Somewhat detrimental  | Neither detrimental or beneficial | Somewhat beneficial   | Very beneficial       |
|-----------------------------------|-----------------------|-----------------------|-----------------------------------|-----------------------|-----------------------|
| ...using a decision aid would be: | <input type="radio"/> | <input type="radio"/> | <input type="radio"/>             | <input type="radio"/> | <input type="radio"/> |

|                                   | Very dull             | Somewhat dull         | Neither dull or interesting | Somewhat interesting  | Very interesting      |
|-----------------------------------|-----------------------|-----------------------|-----------------------------|-----------------------|-----------------------|
| ...using a decision aid would be: | <input type="radio"/> | <input type="radio"/> | <input type="radio"/>       | <input type="radio"/> | <input type="radio"/> |

|                                   | Very unwise           | Somewhat unwise       | Neither unwise or wise | Somewhat wise         | Very wise             |
|-----------------------------------|-----------------------|-----------------------|------------------------|-----------------------|-----------------------|
| ...using a decision aid would be: | <input type="radio"/> | <input type="radio"/> | <input type="radio"/>  | <input type="radio"/> | <input type="radio"/> |

|                                   | Very unenjoyable      | Somewhat unenjoyable  | Neither unenjoyable or enjoyable | Somewhat enjoyable    | Very enjoyable        |
|-----------------------------------|-----------------------|-----------------------|----------------------------------|-----------------------|-----------------------|
| ...using a decision aid would be: | <input type="radio"/> | <input type="radio"/> | <input type="radio"/>            | <input type="radio"/> | <input type="radio"/> |

|                                   | Very useless          | Somewhat useless      | Neither useless or useful | Somewhat useful       | Very useful           |
|-----------------------------------|-----------------------|-----------------------|---------------------------|-----------------------|-----------------------|
| ...using a decision aid would be: | <input type="radio"/> | <input type="radio"/> | <input type="radio"/>     | <input type="radio"/> | <input type="radio"/> |

|                                   | Very unpleasant       | Somewhat unpleasant   | Neither unpleasant or pleasant | Somewhat pleasant     | Very pleasant         |
|-----------------------------------|-----------------------|-----------------------|--------------------------------|-----------------------|-----------------------|
| ...using a decision aid would be: | <input type="radio"/> | <input type="radio"/> | <input type="radio"/>          | <input type="radio"/> | <input type="radio"/> |

>>

Select Question(Link) ▾

### Q7AE

In the context of prenatal screening for trisomy 21...

|                                                                                          | Stronly disagree      | Somewhat disagree     | Neither disagree or agree | Somewhat agree        | Strongly agree        |
|------------------------------------------------------------------------------------------|-----------------------|-----------------------|---------------------------|-----------------------|-----------------------|
| ...most people who are important to me would recommend that I use a decision aid.        | <input type="radio"/> | <input type="radio"/> | <input type="radio"/>     | <input type="radio"/> | <input type="radio"/> |
| ...I would feel that I am able to use a decision aid.                                    | <input type="radio"/> | <input type="radio"/> | <input type="radio"/>     | <input type="radio"/> | <input type="radio"/> |
| ...the people who are most important to me would think that I should use a decision aid. | <input type="radio"/> | <input type="radio"/> | <input type="radio"/>     | <input type="radio"/> | <input type="radio"/> |
| ...I believe that many pregnant women around me would use a decision aid.                | <input type="radio"/> | <input type="radio"/> | <input type="radio"/>     | <input type="radio"/> | <input type="radio"/> |
| ...it would be up to me to use a decision aid.                                           | <input type="radio"/> | <input type="radio"/> | <input type="radio"/>     | <input type="radio"/> | <input type="radio"/> |

|                                                                          | Would strongly disapprove | Would somewhat disapprove | Would neither disapprove or approve | Would somewhat approve | Would strongly approve |
|--------------------------------------------------------------------------|---------------------------|---------------------------|-------------------------------------|------------------------|------------------------|
| ...if I used a decision aid, most of the people who are important to me: | <input type="radio"/>     | <input type="radio"/>     | <input type="radio"/>               | <input type="radio"/>  | <input type="radio"/>  |

>>

Select Question(Link) ▾

### Q8

As a pregnant woman, in the context of prenatal screening for trisomy 21...

|                                                                          | Stronly disagree      | Somewhat disagree     | Neither disagree or agree | Somewhat agree        | Strongly agree        |
|--------------------------------------------------------------------------|-----------------------|-----------------------|---------------------------|-----------------------|-----------------------|
| ...I consider that it would be appropriate for me to use a decision aid. | <input type="radio"/> | <input type="radio"/> | <input type="radio"/>     | <input type="radio"/> | <input type="radio"/> |
| ...I consider that it would be my responsibility to use a decision aid.  | <input type="radio"/> | <input type="radio"/> | <input type="radio"/>     | <input type="radio"/> | <input type="radio"/> |
| ...I consider that it would be necessary for me to use a decision aid.   | <input type="radio"/> | <input type="radio"/> | <input type="radio"/>     | <input type="radio"/> | <input type="radio"/> |

>>

Select Question(Link) ▼

### Q9A

In the context of prenatal screening for trisomy 21...

|                                | Very unlikely         | Somewhat unlikely     | Neither unlikely or likely | Somewhat likely       | Very likely           |
|--------------------------------|-----------------------|-----------------------|----------------------------|-----------------------|-----------------------|
| ...I would use a decision aid. | <input type="radio"/> | <input type="radio"/> | <input type="radio"/>      | <input type="radio"/> | <input type="radio"/> |

|                                                                   | Strongly disagree     | Somewhat disagree     | Neither disagree or agree | Somewhat agree        | Strongly agree        |
|-------------------------------------------------------------------|-----------------------|-----------------------|---------------------------|-----------------------|-----------------------|
| ...using a decision aid would be in keeping with my moral values. | <input type="radio"/> | <input type="radio"/> | <input type="radio"/>     | <input type="radio"/> | <input type="radio"/> |

|                                                                     | Very unlikely         | Somewhat unlikely     | Neither unlikely or likely | Somewhat likely       | Very likely           |
|---------------------------------------------------------------------|-----------------------|-----------------------|----------------------------|-----------------------|-----------------------|
| ...even if it was difficult, I would be able to use a decision aid. | <input type="radio"/> | <input type="radio"/> | <input type="radio"/>      | <input type="radio"/> | <input type="radio"/> |

|                                                                 | Strongly disagree     | Somewhat disagree     | Neither disagree or agree | Somewhat agree        | Strongly agree        |
|-----------------------------------------------------------------|-----------------------|-----------------------|---------------------------|-----------------------|-----------------------|
| ...using a decision aid would be in keeping with my principles. | <input type="radio"/> | <input type="radio"/> | <input type="radio"/>     | <input type="radio"/> | <input type="radio"/> |

|                                            | Very unlikely         | Somewhat unlikely     | Neither unlikely or likely | Somewhat likely       | Very likely           |
|--------------------------------------------|-----------------------|-----------------------|----------------------------|-----------------------|-----------------------|
| ...I would intend on using a decision aid. | <input type="radio"/> | <input type="radio"/> | <input type="radio"/>      | <input type="radio"/> | <input type="radio"/> |

|                                                            | Strongly disagree     | Somewhat disagree     | Neither disagree or agree | Somewhat agree        | Strongly agree        |
|------------------------------------------------------------|-----------------------|-----------------------|---------------------------|-----------------------|-----------------------|
| ...my personal values would lead me to use a decision aid. | <input type="radio"/> | <input type="radio"/> | <input type="radio"/>     | <input type="radio"/> | <input type="radio"/> |

|                                                  | Very low              | Quite low             | Neither low or strong | Quite strong          | Very strong           |
|--------------------------------------------------|-----------------------|-----------------------|-----------------------|-----------------------|-----------------------|
| ...the likelihood of my using a decision aid is: | <input type="radio"/> | <input type="radio"/> | <input type="radio"/> | <input type="radio"/> | <input type="radio"/> |

>>

Select Question(Link) ▼

### Q10

In the context of prenatal screening for trisomy 21, I would feel capable of using a decision aid...

|                                                                                                   | Very unlikely         | Somewhat unlikely     | Neither unlikely or likely | Somewhat likely       | Very likely           |
|---------------------------------------------------------------------------------------------------|-----------------------|-----------------------|----------------------------|-----------------------|-----------------------|
| ...even if my healthcare professional did not have enough time to present it to me.               | <input type="radio"/> | <input type="radio"/> | <input type="radio"/>      | <input type="radio"/> | <input type="radio"/> |
| ...even if it is difficult to understand.                                                         | <input type="radio"/> | <input type="radio"/> | <input type="radio"/>      | <input type="radio"/> | <input type="radio"/> |
| ...even if it did NOT include information about the prenatal tests offered by the private sector. | <input type="radio"/> | <input type="radio"/> | <input type="radio"/>      | <input type="radio"/> | <input type="radio"/> |
| ...even if my decision regarding the screening test was already made.                             | <input type="radio"/> | <input type="radio"/> | <input type="radio"/>      | <input type="radio"/> | <input type="radio"/> |

>>



Select Question(Link) ▾

### Q11

In the context of prenatal screening for trisomy 21, using a decision aid...

|                           | Very unlikely         | Somewhat unlikely     | Neither unlikely or likely | Somewhat likely       | Very likely           |
|---------------------------|-----------------------|-----------------------|----------------------------|-----------------------|-----------------------|
| ...would reassure me.     | <input type="radio"/> | <input type="radio"/> | <input type="radio"/>      | <input type="radio"/> | <input type="radio"/> |
| ...would make me anxious. | <input type="radio"/> | <input type="radio"/> | <input type="radio"/>      | <input type="radio"/> | <input type="radio"/> |

>>

Select Question(Link) ▾

### Q12

In the context of prenatal screening for trisomy 21, I already knew a decision aid:

- Yes  
 No

>>

Select Question(Link) ▾

### Q13

**For the next three (3) questions, please answer the best you can, without using a calculator and without any help:**

A person who takes medication "A" has 1% chance of having an allergic reaction. If 1000 people take medication "A", how many will have an allergic reaction?

Your answer:  person(s) out of 1000

A person who takes medication "B" has 1 chance in 1000 of having an allergic reaction. What percentage of people who take medication "B" will have an allergic reaction?

Your answer:  %

Imagine that you toss a coin 1000 times for heads or tails. At your best guess, how many times out of 1000 will you get heads?

Your answer:  times out of 1000

>>

Select Question(Link) ▼

Below are some common medical and administrative instructions. For the next sections, please choose the word which suits best for the sentences to make sense.

**Preparation for the radiography (X-ray)**

Your doctor has sent you to have a  X-ray.

---

You must have an  stomach when you come for .

---

The X-ray will  from 1 to 3  to do.

>>

Select Question(Link) ▼

Q28\_3D1

Below are some common medical and administrative instructions. For the next sections, please choose the word which suits best for the sentences to make sense.

**The day before the radiography (X-ray)**

For supper have only a  snack of fruit,  and jelly, with coffee or tea.

---

After , you must not  or drink anything at  until after you have  the X-ray.

>>

Select Question(Link) ▼

Below are some common medical and administrative instructions. For the next sections, please choose the word which suits best for the sentences to make sense.

**The day of the radiography (X-ray)**

Do not eat .

---

Do not , even .

---

If you have any , call the X-ray .

>>

Select Question(Link) ▼

Below are some common medical and administrative instructions. For the next sections, please choose the word which suits best for the sentences to make sense.

**Eligibility for the Québec Health Insurance Plan or QHIP (In French: RAMQ)**

I agree to give correct information to  if I am eligible for the Québec Health Insurance Plan (or QHIP).

I  to provide to the QHIP information to  any statements given in

this  and hereby give permission to the  to get such proof.

I  that for the QHIP I must report any  in my circumstances within

(10) days of becoming  of the change.

I understand  if I DO NOT like the  made on my case, I have the  to a fair hearing.

I can  a hearing by writing or  the QHIP.

If you  help for any family , you will have to  a different application form.

, we will use the  on this form to determine your .

>>

Select Question(Link) ▼

**SOCIO**

The next questions will serve for statistical purposes only.

>>

Select Question(Link) ▼

**Q33**

What is your mother tongue?

French

English

Other, please specify:

>>

Select Question(Link) ▼

### Q34

What is your marital status?

- Single
- Married
- Common-law spouse
- Separated/Divorced
- Widow

>>

Select Question(Link) ▼

### Q35

What is your employment status?

- Full-time employment (on preventive withdrawal or not, on maternity leave or not)
- Part-time employment (on preventive withdrawal or not, on maternity leave or not)
- Unemployed and looking for work
- Unemployed and NOT looking for work
- Student
- Retired
- Other, please specify:

>>

Select Question(Link) ▼

### Q37

What is the size of your household?

- I live alone
- Including myself, our household has  people

>>

Select Question(Link) ▼

### Q39

Have you ever been pregnant prior to this pregnancy (whether carried out to full term or not)?

- This is my 1<sup>st</sup> pregnancy
- This is my 2<sup>nd</sup> pregnancy
- This is my 3<sup>rd</sup> pregnancy
- This is at least my 4<sup>th</sup> pregnancy

>>

Select Question(Link) ▼

### Q40

With which healthcare professional did you make the decision regarding whether or not to do the prenatal screening test for trisomy 21?

- Obstetrician-gynecologist
- Midwife
- Family physician
- I don't know
- I have never had to make that decision
- I made the decision alone
- Other, please specify:

>>

Select Question(Link) ▼

### Q41

Which healthcare professional is monitoring your pregnancy:

- Obstetrician-gynecologist
- Midwife
- Family physician
- I don't know
- Other, please specify:

>>

Select Question(Link) ▼

### Q42\_3D

What was your weight BEFORE your pregnancy:  pounds (OR)  kg

What is your height:  feet  inches (OR)  metres  cm

>>

Select Question(Link) ▼

### Q44\_3D

Estimate the driving time between your home and the nearest hospital without traffic congestion, road works, road accidents, etc.

hour(s)  minute(s)

>>

Select Question(Link) ▼

### Q45

Please write the first 3 characters of your zip code (example: G1L):

>>

Select Question(Link) ▼

### MessComplete

Thank you, you have completed the survey.

Please click on the following arrow to receive your reward(s).

For any questions or comments, please contact Johanie Lépine, PhD. by email at: [johanie.lepine@gmail.com](mailto:johanie.lepine@gmail.com), or by phone at: 418-525-4444 extension 53701.

>>
