# Supplementary material for: Role of Psychosocial Factors and Health Literacy in Pregnant Women’s Intention to Use a Decision Aid for Down Syndrome Screening: A Theory-Based Web Survey
Source: PubMed Central journal article supplement (PMC5106559; doi:10.2196/jmir.6362), 2016-10-28
Supplement: jmir_v18i10e283_app3.pdf [file jmir_v18i10e283_app3.pdf]

**Socio-cognitive variables scores and correlations (n=346)**

| Descriptive analyses            |                           |                                | Spearman correlations <sup>b</sup> |      |      |      |      |      |
|---------------------------------|---------------------------|--------------------------------|------------------------------------|------|------|------|------|------|
| Construct                       | Mean <sup>a</sup><br>(SD) | Median <sup>a</sup><br>(Q1-Q3) | Att.                               | A.R. | S.N. | D.N. | M.N. | P.C. |
| Attitude<br>(6 items)           | 3.86<br>(0.59)            | 3.83<br>(3.50-4.17)            | 1.00                               | 0.47 | 0.68 | 0.55 | 0.60 | 0.46 |
| Anticipated regret<br>(2 items) | 2.95<br>(1.04)            | 3.00<br>(2.00-4.00)            | 0.53                               | 1.00 | 0.34 | 0.44 | 0.35 | 0.24 |
| Subjective norm<br>(3 items)    | 3.95<br>(1.04)            | 4.00<br>(3.33-4.33)            | 0.68                               | 0.52 | 1.00 | 0.67 | 0.66 | 0.45 |
| Descriptive norm<br>(3 items)   | 3.79<br>(0.80)            | 4.00<br>(3.33-4.33)            | 0.55                               | 0.44 | 0.67 | 1.00 | 0.56 | 0.43 |
| Moral norm<br>(3 items)         | 4.05<br>(0.87)            | 4.00<br>(3.67-5.00)            | 0.60                               | 0.46 | 0.66 | 0.56 | 1.00 | 0.51 |
| Perceived control<br>(4 items)  | 4.23<br>(0.60)            | 4.25<br>(4.00-4.75)            | 0.46                               | 0.15 | 0.45 | 0.43 | 0.51 | 1.00 |

Att.:

Attitude; A.R.: Anticipated Regret; S.N.: Subjective Norm; D.N.: Descriptive Norm; M.N.: Moral Norm; P.C.: Perceived Control

<sup>a</sup>Out of 5

<sup>b</sup> $P < 0.0001$
