# Supplementary material for: Role of Psychosocial Factors and Health Literacy in Pregnant Women’s Intention to Use a Decision Aid for Down Syndrome Screening: A Theory-Based Web Survey
Source: PubMed Central journal article supplement (PMC5106559; doi:10.2196/jmir.6362), 2016-10-28
Supplement: jmir_v18i10e283_app4.pdf [file jmir_v18i10e283_app4.pdf]

## Intention level by sociodemographic characteristics (n = 346)

| Sociodemographic variable<br><i>n</i> (%) | Intention level <sup>a</sup><br><i>n</i> (%) |            |                   |
|-------------------------------------------|----------------------------------------------|------------|-------------------|
|                                           | <4                                           | 4          | >4                |
| <b>Ethnicity</b>                          |                                              |            |                   |
| White/Caucasian                           | 319 (92.2)                                   | 99 (28.6)  | 86 (24.9)         |
| Other                                     | 27 (7.8)                                     | 10 (2.9)   | 6 (1.7)           |
| <i>P</i>                                  |                                              |            | 0.68 <sup>b</sup> |
| <b>Education</b>                          |                                              |            |                   |
| No high school                            | 4 (1.2)                                      | 1 (0.3)    | 1 (0.3)           |
| High school diploma                       | 25 (7.2)                                     | 11 (3.2)   | 6 (1.7)           |
| Professional diploma                      | 61 (17.6)                                    | 22 (6.4)   | 14 (4.1)          |
| Collegial diploma                         | 88 (25.4)                                    | 19 (5.5)   | 31 (9.0)          |
| University degree                         | 168 (48.6)                                   | 56 (16.2)  | 40 (11.6)         |
| <i>P</i>                                  |                                              |            | 0.51 <sup>b</sup> |
| <b>Annual family income</b>               |                                              |            |                   |
| < \$29 999                                | 24 (6.9)                                     | 13 (3.7)   | 4 (1.2)           |
| \$30 000 - \$59 999                       | 74 (21.4)                                    | 22 (6.4)   | 22 (6.4)          |
| \$60 000 - \$99 999                       | 146 (42.2)                                   | 42 (12.1)  | 38 (11.0)         |
| > \$100 000                               | 82 (23.7)                                    | 24 (6.9)   | 22 (6.4)          |
| No answer                                 | 20 (5.8)                                     | 8 (2.3)    | 6 (1.7)           |
| <i>P</i>                                  |                                              |            | 0.16 <sup>b</sup> |
| <b>Mother tongue</b>                      |                                              |            |                   |
| French                                    | 318 (91.9)                                   | 101 (29.2) | 87 (25.1)         |
| English                                   | 18 (5.2)                                     | 5 (1.5)    | 4 (1.7)           |
| Other                                     | 10 (2.9)                                     | 3 (0.9)    | 1 (0.3)           |
| <i>P</i>                                  |                                              |            | 0.54 <sup>b</sup> |
| <b>Civil status</b>                       |                                              |            |                   |
| Single                                    | 23 (6.7)                                     | 8 (2.3)    | 5 (1.5)           |
| Married                                   | 88 (25.4)                                    | 29 (8.4)   | 19 (5.5)          |
| Partner                                   | 235 (67.9)                                   | 72 (20.8)  | 68 (19.7)         |
| <i>P</i>                                  |                                              |            | 0.95 <sup>b</sup> |
| <b>Employment status</b>                  |                                              |            |                   |
| Unemployed                                | 23 (6.7)                                     | 7 (2.0)    | 7 (2.0)           |
| Part time                                 | 45 (13.0)                                    | 21 (6.1)   | 7 (2.0)           |
| Full time                                 | 269 (77.7)                                   | 77 (22.3)  | 75 (21.7)         |
| Student                                   | 9 (2.6)                                      | 4 (1.2)    | 3 (0.9)           |
| <i>P</i>                                  |                                              |            | 0.22 <sup>b</sup> |
| <b>Household</b>                          |                                              |            |                   |
| 1 person                                  | 9 (2.6)                                      | 4 (1.2)    | 3 (0.9)           |
| 2 persons                                 | 142 (41.2)                                   | 42 (12.2)  | 41 (11.9)         |
| 3 persons                                 | 119 (34.5)                                   | 39 (11.3)  | 30 (8.7)          |
| 4 persons                                 | 55 (15.9)                                    | 16 (4.6)   | 13 (3.8)          |
| 5 persons                                 | 20 (5.8)                                     | 8 (2.3)    | 5 (1.5)           |
| <i>P</i>                                  |                                              |            | 0.66 <sup>b</sup> |
| <b>Pregnancy number</b>                   |                                              |            |                   |
| First                                     | 130 (37.6)                                   | 42 (12.1)  | 42 (12.1)         |
| Second                                    | 137 (39.6)                                   | 48 (13.9)  | 32 (9.3)          |
| Third                                     | 40 (11.5)                                    | 9 (2.6)    | 8 (2.3)           |
| Fourth or more                            | 39 (11.3)                                    | 10 (2.9)   | 10 (2.9)          |
| <i>P</i>                                  |                                              |            | 0.12 <sup>b</sup> |
| <b>Person helping to decide</b>           |                                              |            |                   |
| Health professional                       | 291 (84.1)                                   | 87 (25.1)  | 81 (23.4)         |
|                                           |                                              |            | 123 (35.6)        |

|                           |            |           |           |           |                   |
|---------------------------|------------|-----------|-----------|-----------|-------------------|
| Alone                     | 49 (14.2)  | 19 (5.5)  | 10 (2.9)  | 20 (5.8)  |                   |
| Don't know                | 6 (1.7)    | 3 (0.9)   | 1 (0.3)   | 2 (0.6)   |                   |
| <i>P</i>                  |            |           |           |           | 0.53 <sup>b</sup> |
| Monitored by              |            | <4        | 4         | >4        |                   |
| Family physician          | 105 (30.3) | 38 (11.0) | 27 (7.8)  | 40 (11.6) |                   |
| Obstetrician-gynecologist | 201 (58.1) | 58 (16.8) | 52 (15.0) | 91 (26.3) |                   |
| Midwife                   | 30 (8.7)   | 9 (2.6)   | 11 (3.2)  | 10 (2.9)  |                   |
| Other                     | 10 (2.9)   | 4 (1.2)   | 2 (0.6)   | 4 (1.2)   |                   |
| <i>P</i>                  |            |           |           |           | 0.49 <sup>b</sup> |

<sup>a</sup> Score range from 1 (-) to 5 (+)

<sup>b</sup> Bivariate ordinal logistic regression
