# Supplementary material for: Role of Psychosocial Factors and Health Literacy in Pregnant Women’s Intention to Use a Decision Aid for Down Syndrome Screening: A Theory-Based Web Survey
Source: PubMed Central journal article supplement (PMC5106559; doi:10.2196/jmir.6362), 2016-10-28
Supplement: jmir_v18i10e283_app5.pdf [file jmir_v18i10e283_app5.pdf]

### Bivariate analysis of health literacy, by intention category (n = 346)

| Health literacy<br>n (%)                                | Intention level <sup>a</sup><br>n (%) |               |                   |
|---------------------------------------------------------|---------------------------------------|---------------|-------------------|
|                                                         | <4                                    | 4             | >4                |
| <b>Objective health literacy S – TOFHLA<sup>b</sup></b> |                                       |               |                   |
| Median                                                  | N/A 36.00                             | 36.00         | 36.00             |
| (Q1-Q3)                                                 | (34.00-36.00)                         | (35.00-36.00) | (35.00-36.00)     |
| <i>P</i>                                                |                                       |               | 0.27 <sup>c</sup> |
| <b>Subjective health literacy – 3HLQ<sup>d</sup></b>    |                                       |               |                   |
| Inadequate (<10)                                        | 168 (45.55)                           | 51 (14.74)    | 64 (18.50)        |
| Adequate (≥10)                                          | 178 (51.45)                           | 58 (16.76)    | 81 (23.41)        |
| <i>P</i>                                                |                                       |               | 0.52 <sup>3</sup> |
| <b>Objective numeracy– 3NQ<sup>e</sup></b>              |                                       |               |                   |
| One error or more                                       | 150 (43.35)                           | 46 (13.29)    | 70 (20.23)        |
| All correct answers                                     | 196 (56.65)                           | 63 (18.21)    | 75 (21.68)        |
| <i>P</i>                                                |                                       |               | 0.26 <sup>3</sup> |
| <b>Subjective numeracy– SNS-total<sup>f</sup></b>       |                                       |               |                   |
| < median (3.88/5)                                       | 155 (44.80)                           | 53 (15.32)    | 62 (17.92)        |
| ≥ median (3.88/5)                                       | 191 (55.20)                           | 56 (16.18)    | 83 (23.99)        |
| <i>P</i>                                                |                                       |               | 0.37 <sup>3</sup> |
| <b>Subjective numeracy– SNS-cognitive<sup>f</sup></b>   |                                       |               |                   |
| < median (3.75/5)                                       | 156 (45.09)                           | 49 (14.16)    | 69 (19.94)        |
| ≥ median (3.75/5)                                       | 190 (54.91)                           | 60 (17.34)    | 76 (21.97)        |
| <i>P</i>                                                |                                       |               | 0.61 <sup>3</sup> |
| <b>Subjective numeracy– SNS-preference<sup>f</sup></b>  |                                       |               |                   |
| < median (4.00/5)                                       | 141 (40.75)                           | 45 (13.01)    | 51 (14.75)        |
| ≥ median (4.00/5)                                       | 205 (59.25)                           | 64 (18.50)    | 94 (27.17)        |
| <i>P</i>                                                |                                       |               | 0.24 <sup>3</sup> |

<sup>a</sup> Score range from 1 (-) to 5 (+)

<sup>b</sup> Score range from 0 (-) to 36 (+)

<sup>c</sup> Bivariate ordinal logistic regression

<sup>d</sup> Score range from 0 (-) to 12 (+)

<sup>e</sup> Score range from 0 (-) to 3 (+)

<sup>f</sup> Score range from 1 (-) to 5 (+)

N/A: Not Applicable
