# Supplementary material for: Role of Psychosocial Factors and Health Literacy in Pregnant Women’s Intention to Use a Decision Aid for Down Syndrome Screening: A Theory-Based Web Survey
Source: PubMed Central journal article supplement (PMC5106559; doi:10.2196/jmir.6362), 2016-10-28
Supplement: jmir_v18i10e283_app6.pdf [file jmir_v18i10e283_app6.pdf]

| Descriptive analyses              |             |                 |                        |                   | Spearman Correlations |       |       |       |       |        |
|-----------------------------------|-------------|-----------------|------------------------|-------------------|-----------------------|-------|-------|-------|-------|--------|
|                                   | Range (-/+) | Mean (SD)       | Median (Q1-Q3)         | $\alpha^a$        | <i>P</i>              |       |       |       |       |        |
|                                   |             |                 |                        |                   | Att.                  | A.R.  | S.N.  | D.N.  | M.N.  | P.C.   |
| <b>Objective health literacy</b>  |             |                 |                        |                   |                       |       |       |       |       |        |
| S-TOFHLA                          | 0-36        | 33.52<br>(5.79) | 36.00<br>(35.00-36.00) | 0.96              | 0.003                 | -0.01 | 0.05  | 0.13  | 0.14  | 0.24   |
|                                   |             |                 |                        |                   | .96                   | .81   | .40   | .01   | .008  | <.0001 |
| <b>Subjective health literacy</b> |             |                 |                        |                   |                       |       |       |       |       |        |
| 3HLQ <sup>1</sup>                 | 0-12        | 9.40<br>(1.97)  | 10.00<br>(8.00-11.00)  | 0.70              | 0.07                  | -0.15 | 0.04  | 0.05  | 0.16  | 0.27   |
|                                   |             |                 |                        |                   | .22                   | .004  | .45   | .39   | .002  | <.0001 |
| <b>Objective numeracy</b>         |             |                 |                        |                   |                       |       |       |       |       |        |
| 3NQ                               | 0-3         | 2.40<br>(0.80)  | 3.00<br>(2.00-3.00)    | 0.51 <sup>b</sup> | -0.13                 | -0.13 | -0.01 | -0.02 | 0.03  | 0.10   |
|                                   |             |                 |                        |                   | .01                   | .02   | .86   | .76   | .57   | .07    |
| <b>Subjective numeracy</b>        |             |                 |                        |                   |                       |       |       |       |       |        |
| SNS – total                       | 1-5         | 3.82<br>(0.71)  | 3.88<br>(3.38- 4.38)   | 0.79              | 0.09                  | -0.08 | 0.05  | 0.06  | 0.08  | 0.25   |
|                                   |             |                 |                        |                   | .11                   | .13   | .32   | .24   | .13   | <.0001 |
| SNS – preference                  | 1-5         | 3.99<br>(0.68)  | 4.00<br>(3.50-4.50)    | 0.51              | 0.18                  | -0.02 | 0.18  | 0.18  | 0.20  | 0.28   |
|                                   |             |                 |                        |                   | .001                  | .68   | .001  | .001  | .0002 | <.0001 |
| SNS – cognitive                   | 1-5         | 3.65<br>(1.00)  | 3.75<br>(3.50-4.50)    | 0.89              | -0.02                 | -0.10 | -0.05 | -0.04 | -0.02 | 0.15   |
|                                   |             |                 |                        |                   | .73                   | .05   | .36   | .49   | .70   | .0049  |

**Associations between health literacy scores and sociocognitive factors (n=346)**

Att.: Attitude; A.R.: Anticipated Regret; S.N.: Subjective Norm; D.N.: Descriptive Norm; M.N.: Moral Norm; P.C.: Perceived Control

<sup>a</sup> Coefficient Cronbach Alpha

<sup>a</sup> Scoring for this scale has been reversed from its original position (Chew et. al) [80] so that health literacy ranges for all scales are easier to compare.

<sup>b</sup> KR20
