# Supplementary material for: Role of Psychosocial Factors and Health Literacy in Pregnant Women’s Intention to Use a Decision Aid for Down Syndrome Screening: A Theory-Based Web Survey
Source: PubMed Central journal article supplement (PMC5106559; doi:10.2196/jmir.6362), 2016-10-28
Supplement: jmir_v18i10e283_app7.pdf [file jmir_v18i10e283_app7.pdf]

## Health literacy measure correlations (n=346)

| Spearman correlations, n = 346      |                 |            |           |           |            |             |
|-------------------------------------|-----------------|------------|-----------|-----------|------------|-------------|
| <i>P</i>                            |                 |            |           |           |            |             |
|                                     | Health literacy |            | Objective | Numeracy  |            |             |
|                                     | Objective       | Subjective |           | Objective | Subjective |             |
|                                     |                 |            |           | total     | cognitive  | preferences |
| <b>Health literacy</b>              |                 |            |           |           |            |             |
| Objective (S-TOFHLA <sup>a</sup> )  | 1.00            | 0.17       | 0.25      | 0.18      | 0.17       | 0.14        |
|                                     |                 | .001       | <.0001    | .001      | .001       | .001        |
| Subjective (3HLQ <sup>b</sup> )     | 0.17            | 1.00       | 0.18      | 0.31      | 0.25       | 0.25        |
|                                     | .001            |            | .001      | <.0001    | <.0001     | <.0001      |
| <b>Numeracy</b>                     |                 |            |           |           |            |             |
| Objective (3NQ <sup>c</sup> )       | 0.25            | 0.18       | 1.00      | 0.19      | 0.19       | 0.14        |
|                                     | <.0001          | .001       |           | .0003     | .0005      | .007        |
| <b>Subjective (SNS<sup>d</sup>)</b> |                 |            |           |           |            |             |
| SNS – total                         | 0.18            | 0.31       | 0.19      | 1.00      | 0.89       | 0.71        |
|                                     | .001            | <.0001     | .0003     |           | <.0001     | <.0001      |
| SNS – cognitive                     | 0.17            | 0.25       | 0.19      | 0.89      | 1.00       | 0.33        |
|                                     | .001            | <.0001     | .0005     | <.0001    |            | <.0001      |
| SNS – preferences                   | 0.14            | 0.25       | 0.14      | 0.71      | 0.33       | 1.00        |
|                                     | .001            | <.0001     | .007      | <.0001    | <.0001     |             |

<sup>a</sup>Range from 1 (-) to 36 (+)

<sup>b</sup>Range from 1 (-) to 12 (+)

<sup>c</sup>Range from 1 (-) to 3 (+)

<sup>d</sup>Range from 1 (-) to 5 (+)
